# Supplementary material for: Entwicklung und Validierung einer deutschen Kurzversion des Volunteer Functions Inventory (VFI)
Source: Atypon-hosted journal article supplement (doi:10.1026/0012-1924/a000328), 2024-01-30
Supplement: 0012-1924_a000328_esm3.pdf [file 0012-1924_a000328_esm3.pdf]

## Exploration einer Ein-Item-Fassung

Um eine mögliche Ein-Item-Fassung des VFI zu explorieren, wurden die Items, die in die Kurzversion eingegangen sind, jeweils mit den Skalen der deutschen Adaptation in Datensatz 3 bzw. den englischen Originalskalen in Datensatz 4 korreliert. Diese Korrelationen sind in Tabelle ESM dargestellt.

Dabei zeigt sich, dass die einzelnen Items die Langskalen überwiegend gut repräsentieren. Für die Karriere-, die Selbstwert-, die Schutz- und die soziale Anpassungsfunktion gilt dies uneingeschränkt. Zudem scheinen hier die beiden Items die Gesamtskala jeweils ähnlich gut widerzuspiegeln.

Bei der Erfahrungsfunktion erweist sich nur das zweite Item (praktische Erfahrung) als geeigneter Kandidat für eine Ein-Item-Fassung.

Die Items der Wertefunktion weisen weniger hohe und stark stichprobenabhängige Korrelationen mit der Langfassung auf, wobei Item 1, das auf das Engagement für eine als persönlich wichtig erachtete Sache gerichtet ist, in einer Stichprobe nur niedrig korreliert. Das höher korrelierende Item, bei welchem es darum geht, durch die Freiwilligenarbeit anderen Menschen zu helfen, eignet sich nicht für sachbezogene Freiwilligenarbeit. Daher ist es fraglich, ob die Wertefunktion angemessen durch ein einzelnes der bestehenden Items erfasst werden kann.

**Tabelle ESM.** Korrelationen zwischen den in der Kurzversion enthaltenen Items und den Skalen der deutschen Adaptation in Datensatz 3 bzw. den Skalen der englischen Originalversion in Datensatz 4 (lang)

|                                               | KAR<br>lang        | SEW<br>lang        | SchU<br>lang       | SoA <sup>1,2</sup><br>lang | ERF<br>lang        | WER<br>lang        |
|-----------------------------------------------|--------------------|--------------------|--------------------|----------------------------|--------------------|--------------------|
| Karrierefunktion (KAR)                        |                    |                    |                    |                            |                    |                    |
| Item 1 (Fuß in die Tür)                       | <b>.87**/.81**</b> | .33**/.35**        | .30**/.42**        | .03/.22*                   | .40**/.33**        | -.07/-.04          |
| Item 2 (erfolgreich sein)                     | <b>.87**/.84**</b> | .36**/.51**        | .33**/.56**        | .06/.30**                  | .41**/.38**        | -.07/-.03          |
| Selbstwertfunktion (SEW)                      |                    |                    |                    |                            |                    |                    |
| Item 1 (Selbstwertgefühl)                     | .38**/.48**        | <b>.86**/.78**</b> | .52**/.62**        | .11*/.46**                 | .39**/.33**        | .06/.09            |
| Item 2 (wichtig sein)                         | .39**/.42**        | <b>.83**/.86**</b> | .53**/.66**        | .09*/.40**                 | .38**/.36**        | -.01/.17           |
| Schutzfunktion (SchU)                         |                    |                    |                    |                            |                    |                    |
| Item 1 (Ablenkung)                            | .26**/.32**        | .54**/.48**        | <b>.87**/.79**</b> | .06/.40**                  | .30**/.25*         | .11**/.13          |
| Item 2 (Bewältigung)                          | .36**/.47**        | .52**/.58**        | <b>.83**/.82**</b> | .13**/.52**                | .42**/.42**        | .10*/.14           |
| Soziale Anpassungsfunktion <sup>2</sup> (SoA) |                    |                    |                    |                            |                    |                    |
| Item 1 (teilt Interesse)                      | - / .26            | - / .50**          | - / .57**          | - / <b>.89**</b>           | - / .35**          | - / .11            |
| Item 2 (wichtige Tätigkeit)                   | - / .39**          | - / .50**          | - / .53**          | - / <b>.88**</b>           | - / .34**          | - / .09            |
| Erfahrungsfunktion (ERF)                      |                    |                    |                    |                            |                    |                    |
| Item 1 (neue Sichtweise)                      | .26**/-.04         | .27**/.19          | .22**/.12          | .10*/.19                   | <b>.69**/.52**</b> | .15**/.14          |
| Item 2 (prakt. Erfahrung)                     | .45**/.13          | .33**/.31**        | .34**/.32**        | .15**/.14                  | <b>.80**/.66**</b> | .13**/.45**        |
| Wertefunktion (WER)                           |                    |                    |                    |                            |                    |                    |
| Item 1 (Sache)                                | .11*/.04           | .13**/.19          | .05/.15            | .13**/.05                  | .25**/.26**        | <b>.18**/.72**</b> |
| Item 2 (helfen)                               | -.02/-.02          | .11**/.18          | .01/.17            | .14**/.15                  | .12*/.14           | <b>.69**/.60**</b> |

*Anmerkungen:* <sup>1</sup>In Datensatz 3 wurde abweichend von der sozialen Anpassungsfunktion eine soziale Norm erfasst; <sup>2</sup>Soziale Anpassungsfunktion in der Originalformulierung; \*\*  $p < .01$ ; \*  $.01 < p < .05$ .
